# Supplementary material for: Physiological and Transcriptomic Analysis Reveals the Responses and Difference to High Temperature and Humidity Stress in Two Melon Genotypes
Source: MDPI journal article supplement (doi:10.3390/ijms23020734), 2022-01-10
Supplement: s1 [file s1]

**Table S1.** List of primers used for qRT-PCR.

| Gene code      | Forward Primer       | Reverse Primer        | Gene description |
|----------------|----------------------|-----------------------|------------------|
| MELO3C004214.2 | GGCTTCCAACACCTTGAT   | GGTTCTCTGGCACTTCTC    | <i>Lhca1</i>     |
| MELO3C015076.2 | TGCTGCCAGACAGAGATT   | GATCACTTCGCCGTATGC    | <i>Lhca3</i>     |
| MELO3C035770.2 | CTTCCAGCACAGTCTTCC   | GCGTGTACCACCTAAGTT    | <i>Lhca4</i>     |
| MELO3C017180.2 | CGTCAACTCTGTTCGTAATC | CATTGGCTAGTTCCTTCTCT  | <i>Lhca4</i>     |
| MELO3C012912.2 | GTGAGCCTCCATCTTACC   | TTGTGAACCAGCCTTGAA    | <i>Lhcb1</i>     |
| MELO3C002727.2 | TCGGAGAAGCAGTATGGT   | GCAAGATGGTCAGCAAGA    | <i>Lhcb1</i>     |
| MELO3C007154.2 | TCCACCACCTCCAACAAT   | CACCGAACTTCACACCAT    | <i>Lhcb1</i>     |
| MELO3C032881.2 | GAGCCACCATCCTACCTT   | CCATTCTTCAACTCCTTAACC | <i>Lhcb1</i>     |
| MELO3C019677.2 | GCCAAGCCGTCAAGTTAT   | CAATTCTGTATCCTTCCACTG | <i>Lhcb1</i>     |
| MELO3C024206.2 | ACGCCATCTTACCTGACT   | ATTGCCAGCCTTCCATTC    | <i>Lhcb2</i>     |
| MELO3C016556.2 | GTATGGTTCAAGGCAGGAG  | CAAGGTGGTCAAGAAGGTT   | <i>Lhcb3</i>     |
| MELO3C003238.2 | GCAACCTCCTCCTTCATC   | GTGAGCCATTCAACAGAGA   | <i>Lhcb4</i>     |
| MELO3C022113.2 | CTCAGCAAGAAGCCAGAA   | GCCACCAACAAGAACAAC    | <i>Lhcb5</i>     |
| MELO3C029936.2 | ATTCCACTCCAGGCTTGT   | CTTGTTCCATTCTGACTTTC  | <i>Lhcb6</i>     |
| MELO3C008358.2 | CCGTGGAAGTAGCAGAAC   | CGAAGGAGAATGGAGCAAT   | <i>Lhcb6</i>     |
| <i>Actin</i>   | TCTATTCCAGCCATCTCTC  | GACCCTCCAATCCAAAC     |                  |
